## Particle Uptake Driven Phagocytosis in Macrophages and Neutrophils Enhances Bacterial Clearance

Preeti Sharma<sup>1</sup>, Anjali Vijaykumar<sup>1</sup>, Jayashree Vijaya Raghavan<sup>1</sup>, Supriya Rajendra Rananaware<sup>2</sup>, Alakesh Alakesh<sup>1</sup>, Janhavi Bodele<sup>1</sup>, Junaid Ur Rehman<sup>1</sup>, Shivani Shukla<sup>1</sup>, Virta Wagde<sup>1</sup>, Savitha Nadig<sup>3</sup>, Sveta Chakrabarti<sup>4</sup>, Sandhya S. Visweswariah<sup>4</sup>, Dipankar Nandi<sup>2</sup>, Balasubramanian Gopal<sup>3</sup>, Siddharth Jhunjhunwala<sup>1\*</sup>

1 – Centre for BioSystems Science and Engineering,

2 – Department of Biochemistry,

3 – Molecular Biophysics Unit

4 – Department of Molecular Reproduction, Development and Genetics

Indian Institute of Science, Bengaluru, India – 560012

\*Address correspondence to [siddharth@iisc.ac.in](mailto:siddharth@iisc.ac.in)

### Abstract:

Humans are exposed to numerous synthetic foreign particulates in the form of environmental pollutants and diagnostic or therapeutic agents. Specialized immune cells (phagocytes) clear these particulates by phagocytosing and attempting to degrade them. The process of recognition and internalization of the particulates may trigger changes in the function of phagocytes. Some of these changes, especially the ability of a particle-loaded phagocyte to take up and neutralize pathogens, remains poorly studied. Herein, we demonstrate that the uptake of non-stimulatory cargo-free particles enhances the phagocytic ability of monocytes, macrophages and neutrophils. The enhancement in phagocytic ability was independent of particle properties, such as size or the base material constituting the particle. Additionally, we show that the increased phagocytosis was not a result of cellular activation or cellular heterogeneity but was driven by changes in cell membrane fluidity and cellular compliance. A consequence of the enhanced phagocytic activity was that particulate-laden immune cells neutralize *E. coli* faster in culture. Moreover, when administered in mice as a prophylactic, particulates enable faster clearance of *E. coli* and *S. epidermidis*. Together, we demonstrate that the process of uptake induces cellular changes that favor additional phagocytic events. This study provides insights into using non-stimulatory cargo-free particles to engineer immune cell functions for applications involving faster clearance of phagocytosable particulates.

## 1 **Introduction**

2 Specialized immune cells utilize the process of phagocytosis for both tissue homeostasis and  
3 host defense.<sup>1-3</sup> As part of host defense, these phagocytic immune cells take up foreign  
4 particulates such as microbial pathogens, diagnostic or therapeutic agents,<sup>4</sup> and micrometer-  
5 sized environmental pollutants,<sup>5</sup> and attempt to degrade them within intracellular compartments.  
6 The process of interaction with and uptake of foreign substances may change the phenotype  
7 and function of the phagocytic immune cells, a phenomenon widely investigated in the context  
8 of microorganisms.<sup>6</sup> In contrast, the effects of uptake of synthetic particulates on immune cell  
9 functions are relatively less explored.

10 Based on the physicochemical properties of a synthetic particle, reports have suggested that  
11 phagocytic immune cells may be activated towards an inflammatory<sup>7-9</sup> or anti-inflammatory  
12 phenotype.<sup>8,10-13</sup> Additionally, uptake of particles may alter cytokine secretion, chemotaxis  
13 behavior, oxidative burst, and nitric oxide generation in these cells.<sup>13-20</sup> However, it remains  
14 unclear if the uptake of particles would affect the ability of a phagocytic immune cell to  
15 subsequently phagocytose and neutralize a pathogen.

16 In this study, we determine how the uptake of particles changes an immune cell's phagocytic  
17 and bactericidal abilities. Using various phagocytic cell types and particles, we demonstrate that  
18 uptake of a non-stimulatory cargo-free particle enhances the phagocytic ability of immune cells.  
19 We show that this increased phagocytosis is not a result of cellular activation or cellular  
20 heterogeneity; instead, the uptake of particles drives subsequent phagocytic events. Finally, we  
21 demonstrate that a consequence of the enhanced uptake ability is faster clearance of bacteria  
22 both *in vitro* and *in vivo*.

23

24 **Results:**

25

26 **Sequential Phagocytosis**

27 Phagocytic immune cells have the ability to engulf multiple particulates. Given the ever-  
28 increasing exposure of humans to foreign particulates, phagocytic cells might encounter  
29 particulates followed by pathogens in a sequential manner. The question of interest to us was  
30 whether the phagocytic ability of these cells is altered after an uptake event. To address this  
31 question, we sequentially added particles labeled with two different fluorophores, to cells in  
32 culture (Figure 1A). We quantified the fraction of cells that had taken up both the particles  
33 (sequential uptake) and compared them to the fraction of cells that had only taken up the  
34 particle added second in the sequence (bystander uptake). We observed that sequential uptake  
35 was significantly higher than bystander uptake for all combinations of polystyrene (PS) particle  
36 (carboxyl-modified surfaces) sizes tested (Figure 1B and supplementary figure 1A). Besides, the  
37 number of particles phagocytosed by cells in the second round, quantified as median  
38 fluorescence intensity (MFI), was also higher for cells that had taken up particles in the first  
39 round (Supplementary figure 1B and 1C). Notably, the number of particles taken up by a cell in  
40 the second round significantly increased with the number of particles it phagocytosed in the first  
41 round, suggesting dose-dependent priming of phagocyte for the second round of uptake  
42 (Supplementary figure 2A and 2B). Furthermore, the phenomenon of enhanced sequential  
43 phagocytosis was independent of the time of incubation with particles in the first round  
44 (Supplementary 2C), for the timeframes we tested.

45

46 Physicochemical properties of the bulk material and the surface characteristics of particulates  
47 are known to dictate the particle-immune cell interaction.<sup>21</sup> To determine if these properties  
48 affected the sequential phagocytosis capacity, we used particles composed of materials  
49 approved for clinical use, such as PLGA, PCL and Silica. Uptake of particles made of these  
50 materials also resulted in enhanced sequential phagocytosis (Figure 1C). Additionally, cells that  
51 take up PS particles whose surfaces do not have a carboxyl group or those that have been  
52 modified with polyethylene glycol (PEG) also showed the capacity for increased phagocytosis  
53 (Supplementary Figure 3).

54

55 The phenomenon of enhanced sequential phagocytosis was observed in another cell line (dHL-  
56 60), and among primary monocytes and neutrophils isolated from peripheral venous blood of  
57 humans (Figure 2A). Interestingly, this phenomenon was not limited to mammalian systems, as

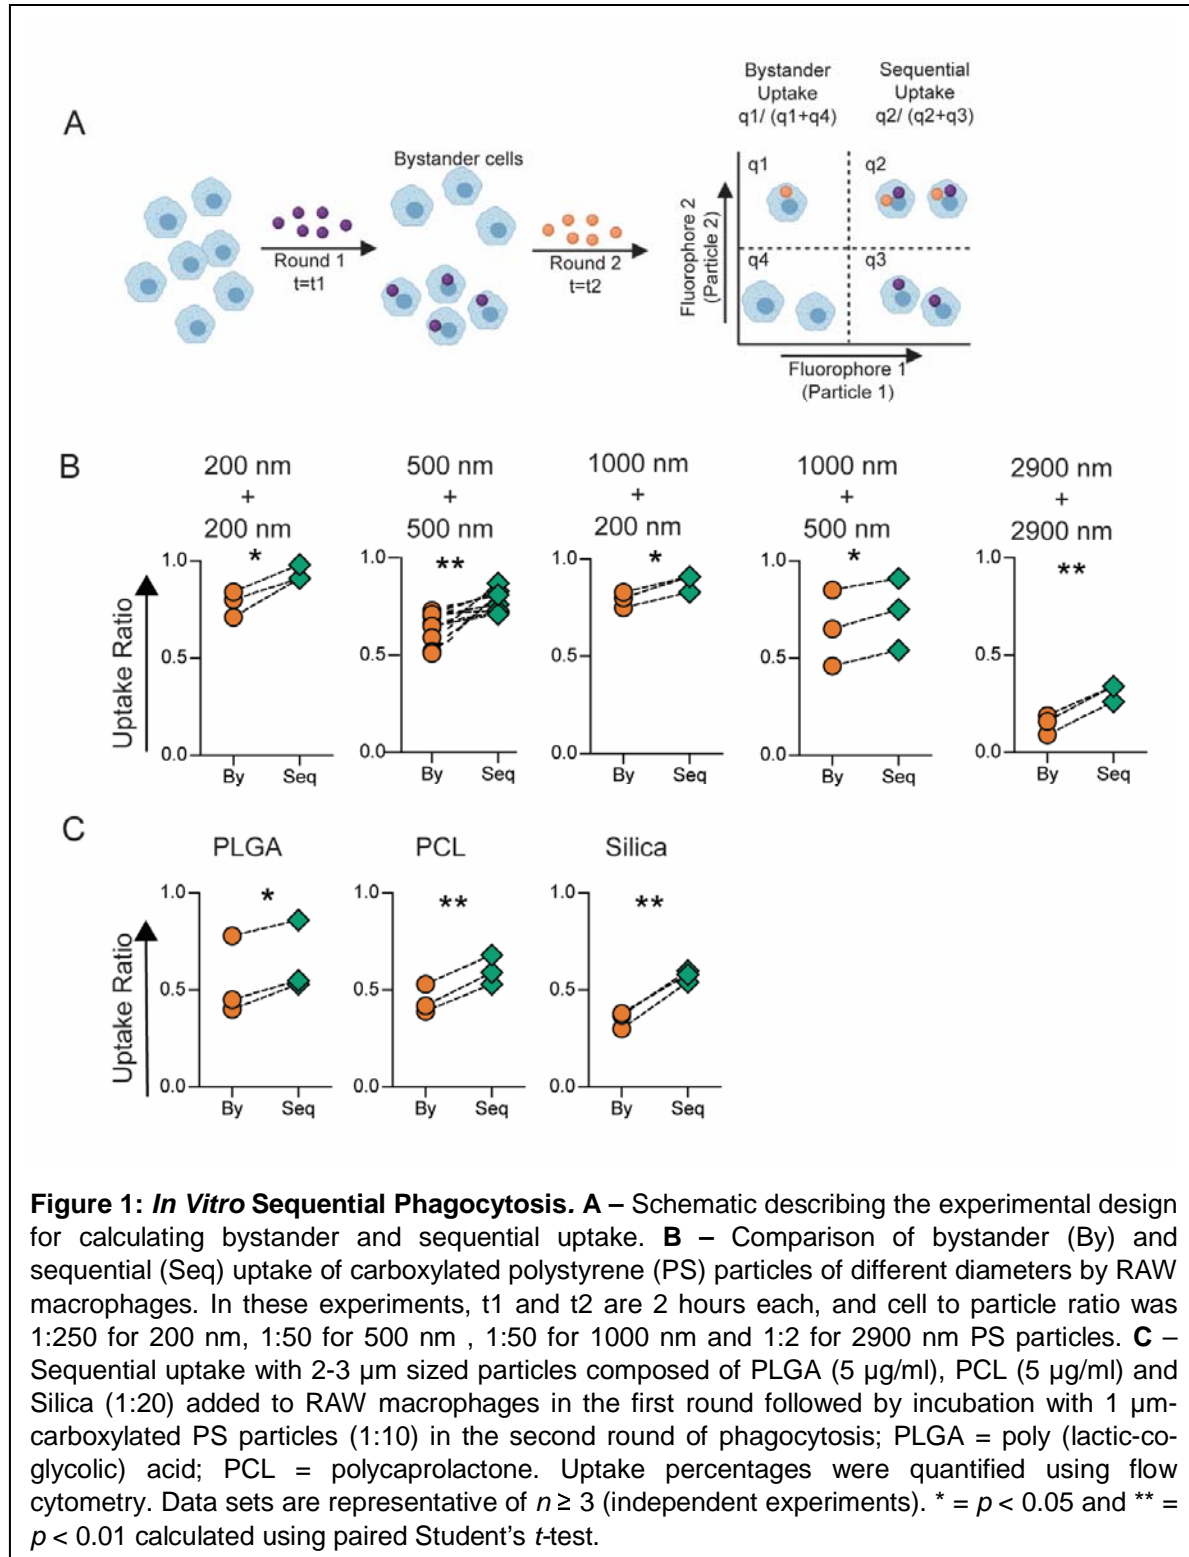

58 hemocytes isolated from *Drosophila melanogaster* larvae also showed increased sequential  
 59 phagocytosis (Figure 2B), suggesting that this phenomenon was conserved across phylae. To

60 determine if sequential uptake was observed *in vivo*, fluorescent particles were sequentially  
61 administered via the intraperitoneal route in mice, and increased sequential phagocytosis was  
62 observed in the peritoneal macrophages (Figure 2C).  
63

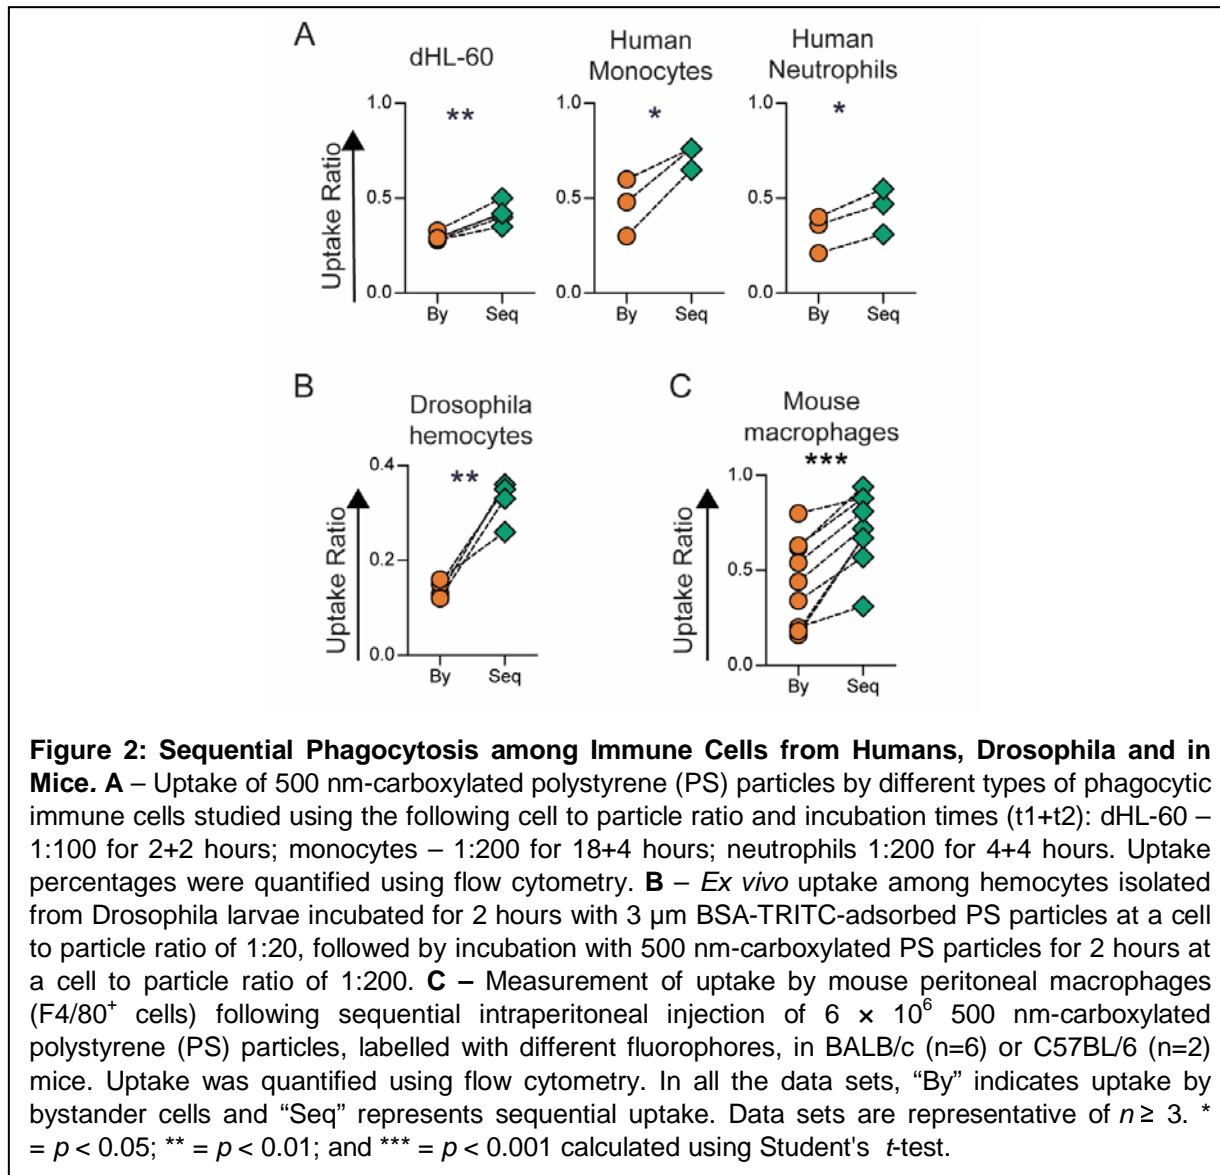

64  
65 We hypothesized that the increase in the ability of cells to phagocytose particles following an  
66 initial uptake event could be due to: (i) cellular activation through TLR stimulation during the first  
67 round of phagocytosis; or (ii) pre-existing cellular heterogeneity – that is, some cells are  
68 inherently more phagocytic; or (iii) the first uptake event drives cellular changes that enhance a  
69 cell's ability to phagocytose substances.

70

### 71 **Cellular activation Does Not Drive Enhanced Sequential Phagocytosis**

72 Phagocytosis of silica and iron oxide particles have been reported to activate immune cells  
73 towards pro-inflammatory phenotype characterized by secretion of inflammatory cytokines and  
74 generation of reactive oxygen and nitrogen species.<sup>18,20</sup> Activated immune cells are thought to  
75 have an increased phagocytic ability. Further, the presence of contaminating sources of  
76 lipopolysaccharide (LPS) on particles could result in increased uptake. We investigated whether  
77 the enhanced phagocytic ability observed in our experiments is due to cellular activation  
78 following Toll-like receptor (TLR)-4 stimulation. We conducted sequential phagocytosis  
79 experiments with RAW cells that were activated with LPS. TLR stimulation with LPS is known  
80 to increase the number of cells that will undergo phagocytosis<sup>22</sup>, which was confirmed in the  
81 present study as well (Supplementary Figure 4A). We observed enhanced sequential  
82 phagocytosis even after uniform pre-activation of cells with LPS (Figure 3A). Next, we blocked  
83 the TLR-4 pathway using a chemical inhibitor (TAK-242<sup>23</sup>) prior to the sequential addition of  
84 particles. The inhibitor was able to prevent an LPS-mediated increase in overall phagocytosis  
85 (Supplementary Figure 4B and 4C). However, even in the presence of this inhibitor, cells  
86 showed increased sequential uptake (Figure 3B).

87

88 Activated immune cells are known to produce reactive oxygen species (ROS), nitric oxide (NO)  
89 and upregulate the expression of inflammatory cytokines.<sup>24</sup> We investigated if uptake of PS  
90 particles stimulates cells towards an activated phenotype. We observed that while LPS or LPS +  
91 IFN $\gamma$  stimulated cells in culture produced increased levels of intracellular ROS (Figure 3C), NO  
92 (Figure 3D) and the inflammatory cytokines IL-1 $\beta$ , IL-6 and TNF- $\alpha$  (Figure 3E), cells that had  
93 phagocytosed PS particles did not show any changes in the levels of these molecules  
94 compared to controls (naïve cells in culture), showcasing the non-stimulatory nature of these  
95 particulates. Further, the anti-inflammatory or M2-type cytokine, IL-10, remained undetectable in  
96 all these culture conditions. Collectively, these data suggest that enhanced sequential  
97 phagocytosis is not a result of traditional cellular activation caused by TLR stimulation.

98

### 99 **Cellular Heterogeneity is Not Necessary for Enhanced Sequential Phagocytosis**

100 Recent studies<sup>25,26</sup> have suggested that differing phagocytic capacities within a given  
101 population of immune cells might result in a subset of these cells taking up more bacteria. We  
102 used a mouse macrophage cell line to determine if heterogeneity explains the observed  
103 increases in sequential uptake. For the first set of experiments, we incubated cells with PS

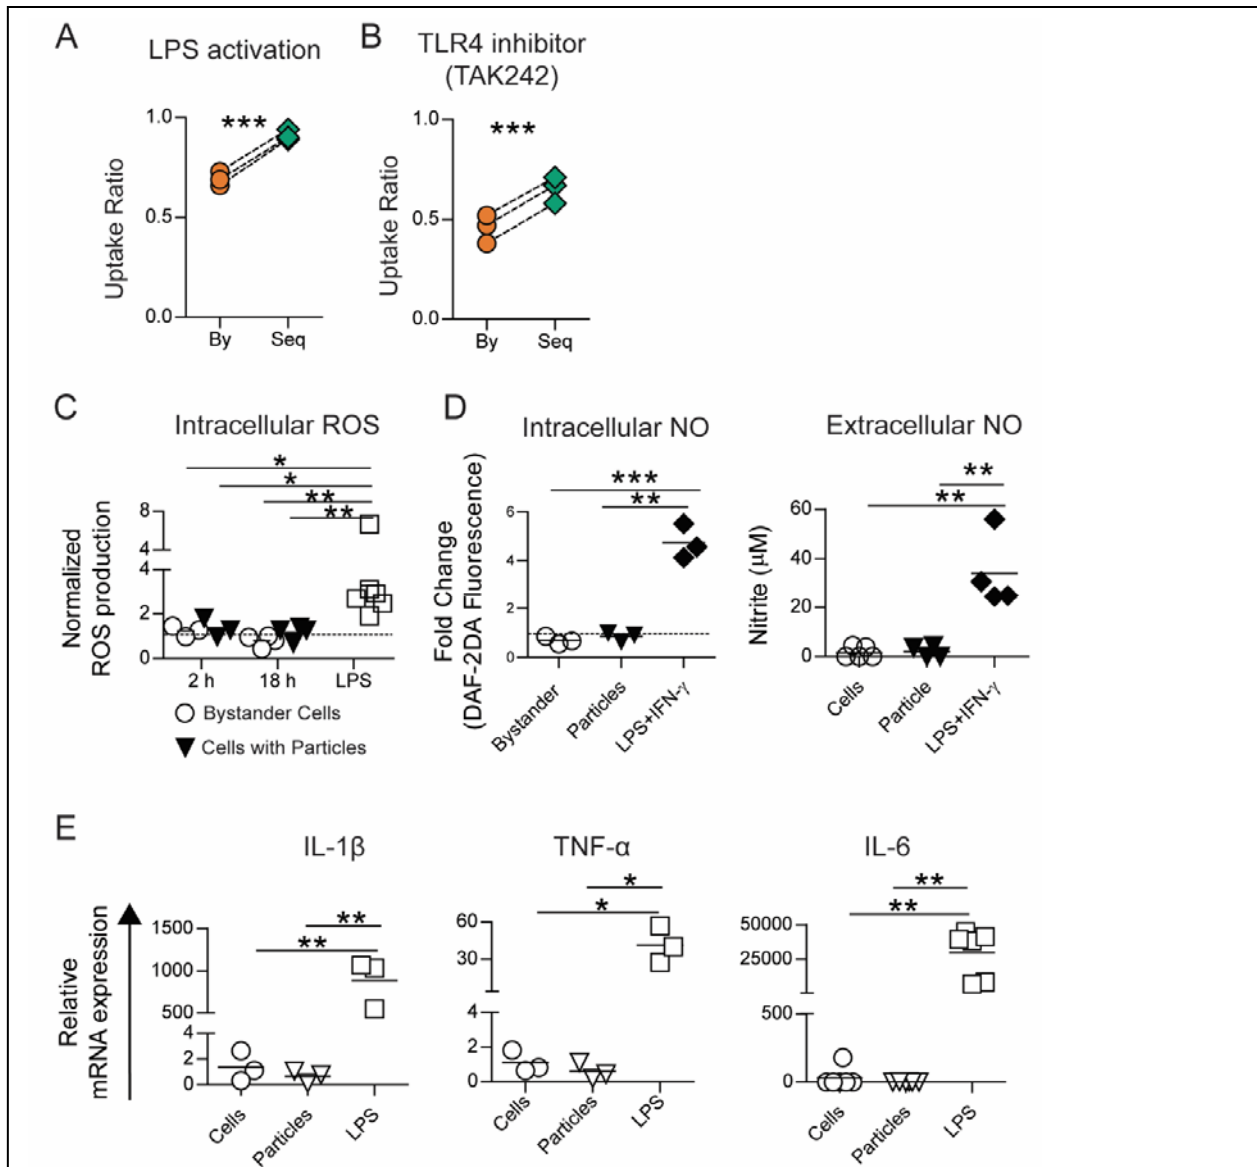

**Figure 3: Sequential uptake is not due to TLR based cellular activation.** **A** – Uptake of 500 nm-carboxylated polystyrene (PS) particles by RAW macrophages (1:50 cell to particle ratio) following pre-activation of all cells with LPS (1  $\mu$ g/ml for 18 hours). **B** – Sequential uptake of 500 nm-carboxylated PS particles by RAW macrophages following the treatment of cells with TAK-242 (2  $\mu$ M for 6 hours) to block TLR-4 mediated cellular activation. **C** – Intracellular reactive oxygen species (ROS) quantified using flow cytometry following incubation of RAW macrophages with 500 nm-carboxylated PS particles (1:50 cell to particle ratio) for 2 or 18 hours, or with LPS for 18 hours. Data are normalized to ROS production in cells that were left untreated for the same times. **D** – Intracellular nitric oxide (NO) production determined after incubating cells with 500 nm-carboxylated PS particles (1:10 cell to particle ratio; lower particle ratio was used due to length of incubation) or LPS and IFN- $\gamma$  for 36 hours. Extracellular NO production determined after incubating cells with 500 nm-carboxylated PS particles (1:100 cell to particle ratio) or LPS and IFN- $\gamma$  for 36 hours. **E** – Relative mRNA expression of pro-inflammatory cytokine genes (IL-1 $\beta$ , IL-6 and TNF- $\alpha$ ) measured using RT-qPCR. Data are based on  $n \geq 3$  independent experiments (each performed in duplicate). \* =  $p < 0.05$  \*\* =  $p < 0.01$  and \*\*\* =  $p < 0.001$  determined using paired Student's  $t$ -test or one-way ANOVA.



105 particle, suggesting a close to homogenous population in terms of a phagocytic event. We  
106 observe that these cells showed a higher phagocytic ability (percentage of cells with particles)  
107 when compared to naïve cells that had not been exposed to particles (Supplementary Figure 5).

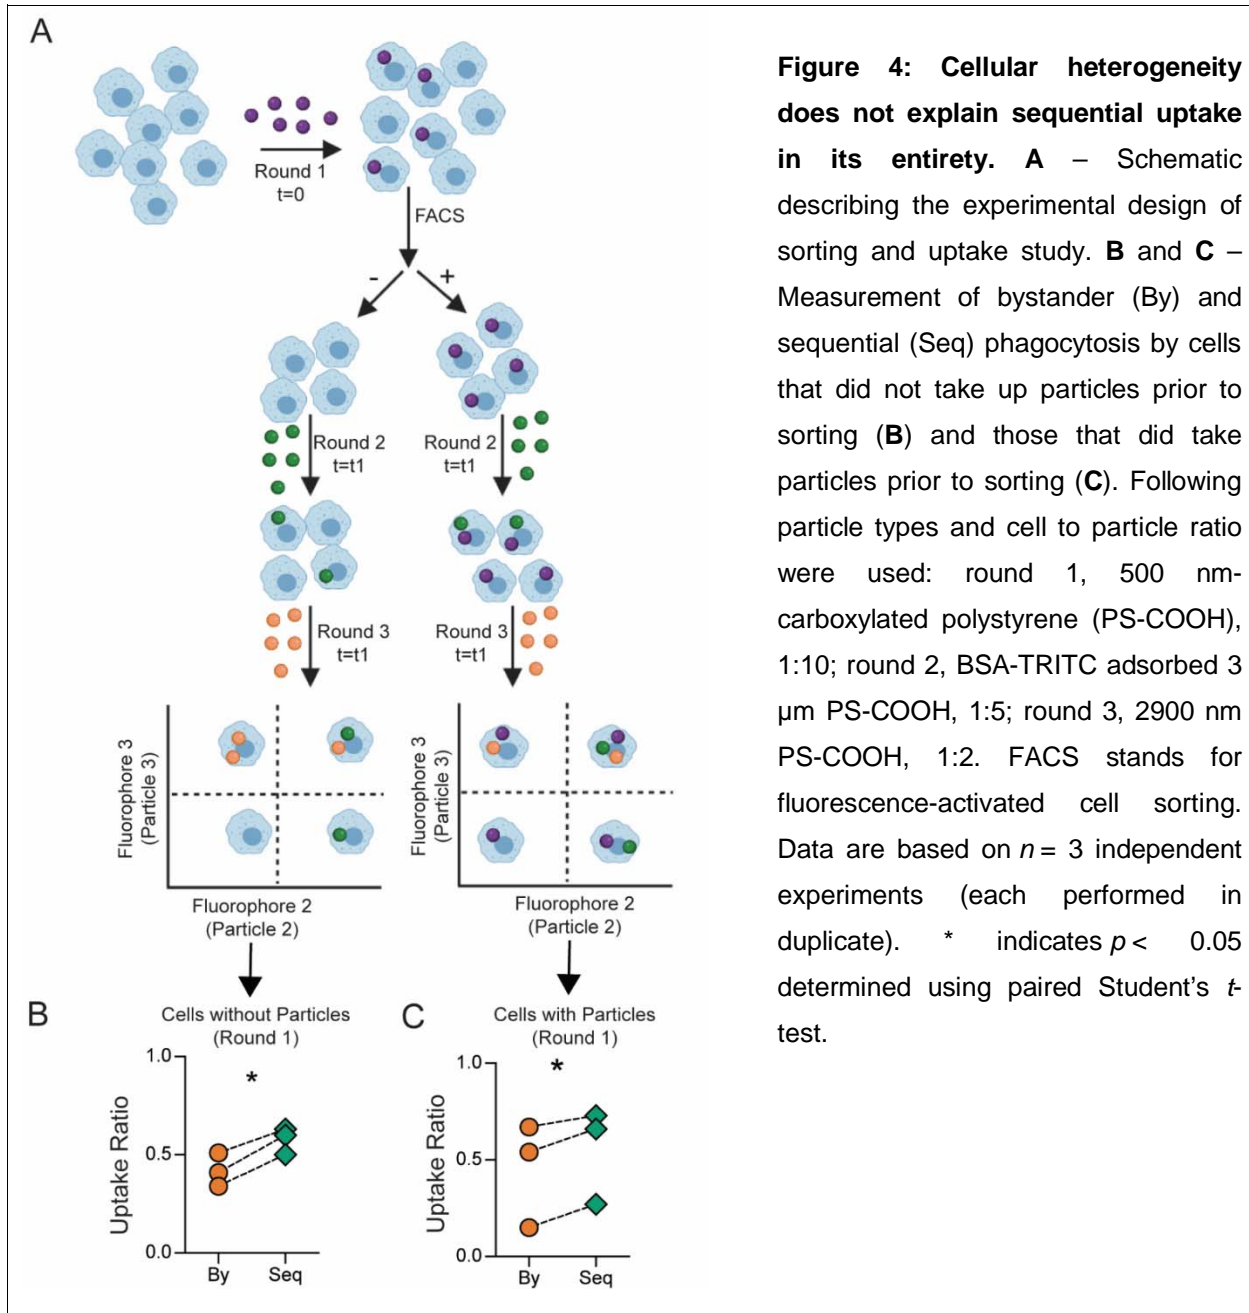

108

109 Separately, we also incubated cells with a lower number of particles that lead to approximately  
110 half the cells in a culture-dish taking up particles, resulting in a heterogeneous population in  
111 terms of a phagocytic event. These cells were then sorted to separate cells containing particles  
112 (particle-positive) from cells that did not take up particles (particle-negative). The sorted cells



113 were then cultured with particles labeled with two different fluorophores in a sequential manner  
114 (Figure 4A). The particle-negative cells, which could possibly be considered as a homogenous  
115 population of cells with lower phagocytic capacity, also showed enhanced sequential  
116 phagocytosis ability (Figure 4B). Additionally, the 'particle-positive' cells were not only capable  
117 of further phagocytosis but demonstrated increased sequential phagocytosis ability (Figure 4C).  
118 These data suggest that increased phagocytic ability is not likely due to cellular heterogeneity  
119 alone, at least in this cell line.

120

### 121 Phagocytosis Induces Changes in Membrane Fluidity and Cellular Stiffness

122 Having observed that neither cellular activation nor cellular heterogeneity could explain the  
123 enhanced sequential phagocytosis phenomena, we explored if phagocytosis induces changes  
124 in cells that might result in increased uptake. Both the cell membrane and the cytoskeleton are  
125 actively involved in phagocytosis, and hence we assessed changes to these structures following  
126 uptake of PS particles. Using a fluorescent probe that detects perturbations in membrane phase

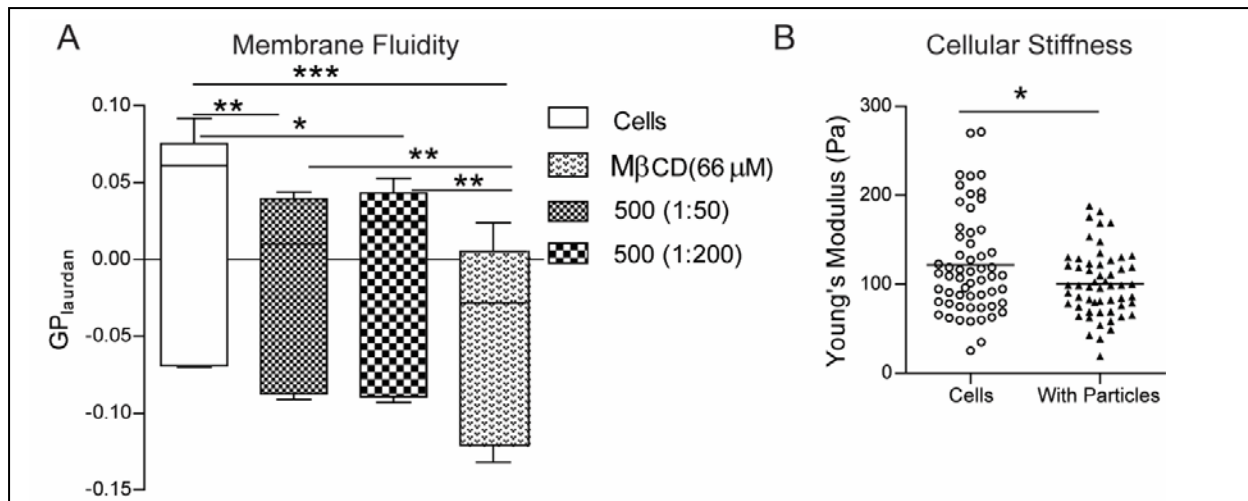

**Figure 5: Phagocytosis induced changes in macrophage membrane fluidity and cellular stiffness.** **A** – Measurement of membrane fluidity using the generalized polarization (GP) value for the membrane dye Laurdan in RAW macrophages that were incubated with 500 nm-carboxylated polystyrene (PS) particles at two different cell-to-particle ratios and compared to the negative control of naïve cells (cells) as well as the positive control of cells treated with methyl-beta-cyclodextrin (MβCD).  $n = 6$  independent experiments. \* indicates  $p < 0.05$ , \*\* indicates  $p < 0.01$  and \*\*\* indicates  $p < 0.001$  calculated using one-way ANOVA followed by Bonferroni post-hoc test for comparison of multiple groups. **B** – Measurement of apparent modulus of a cell using atomic force microscopy. Young's modulus of naïve cells (Cells) and cells that have been treated with 500 nm-carboxylated PS particles (With Particles) is plotted, with each dot representing a single cell. Data sets are representative of at least 60 cells measured across 3 independent experiments. \* indicates  $p < 0.05$  calculated using unpaired  $t$ -test with Welch's correction.

127 properties, we determined that the fluidity (measured based on generalized polarization value of  
128 the dye) of the membranes of cells that have phagocytosed PS particles was significantly higher  
129 as compared to naïve cells (Figure 5A). Methyl-beta-cyclodextrin (M $\beta$ CD), a cholesterol-  
130 depleting agent, was used as a positive control in these experiments and shows the highest  
131 increases in membrane fluidity. Increased membrane fluidity has been associated with higher  
132 phagocytic ability<sup>27</sup>, and the above observation suggests that one possible explanation for the  
133 enhanced sequential phagocytosis could be changes in fluidity of cell membranes.

134

135 Additionally, a cell must change its shape to internalize phagocytic targets. Hence, we  
136 measured the ability of a cell to deform by estimating the cellular stiffness using force-distance  
137 spectroscopy in an atomic force microscope. The Young's modulus of cells that had  
138 phagocytosed 500 nm-carboxylated PS particles was significantly lower than naïve cells (Figure  
139 5B and Supplementary Figure 6), indicating an enhanced ability to deform, which might partly  
140 explain the increase in phagocytic capacity.

141

#### 142 **Increased *in vitro* clearance of *E. coli***

143 The primary function of phagocytic immune cells is to recognize, phagocytose and degrade  
144 pathogenic microorganisms.<sup>3,28</sup> Phagocytic cells that have internalized particles might encounter  
145 bacteria; hence, we examined the effect of particle uptake on the internalization and killing of  
146 bacteria by phagocytic immune cells. We used *E. coli* as a model system for these studies. The  
147 bacteria were added to macrophage cell-line cultures (MOI 3.3 - 44) that had either been  
148 exposed to PS particles (at a dose that resulted in >90% cells having particles) or naïve cells. In  
149 concurrence with our enhanced sequential uptake data, at 2 hours post *in vitro* infection, we  
150 observed increased internalization of *E. coli* by RAW macrophages that had taken up particles  
151 compared to naïve cells (Figure 6A). Higher bacterial numbers (measured as colony-forming  
152 units (CFUs)) were observed in cells with particles at 6 hours too; however, by 18 hours, the  
153 bacterial numbers in cells with particles were similar to that of naïve cells. Upon calculation of  
154 the clearance of bacteria, which is the number internalized initially to the number that remained  
155 at the end of measurements, we observe that cells with particles had cleared a greater  
156 percentage of bacteria (Figure 6B).

157

#### 158 **Unaltered invasion and replication of *S. Typhimurium* inside macrophages with particles**

159 Bacteria such as *Salmonella* are known to invade, survive and replicate inside phagocytic  
160 immune cells actively. So, we evaluated if the phenomenon of enhanced sequential

161 phagocytosis would alter the interaction of such bacteria with phagocytes. We added *S.*  
162 Typhimurium, an intracellular pathogen, to RAW macrophage cultures (*in vitro*) (MOI 5 - 50) and  
163 observed that the numbers of intracellular bacteria were not different in cells with PS particles  
164 when compared to cells without particles (Supplementary Figure 7). This observation is not  
165 surprising as these specific bacteria actively invade macrophages, in addition to being taken up  
166 by phagocytosis. Further, the numbers of these bacteria continued to remain equally high in  
167 both cells with particles and naïve cells, which might also be expected as we show that the  
168 uptake of the non-stimulatory cargo-free PS particle only affects the cell's phagocytic ability and

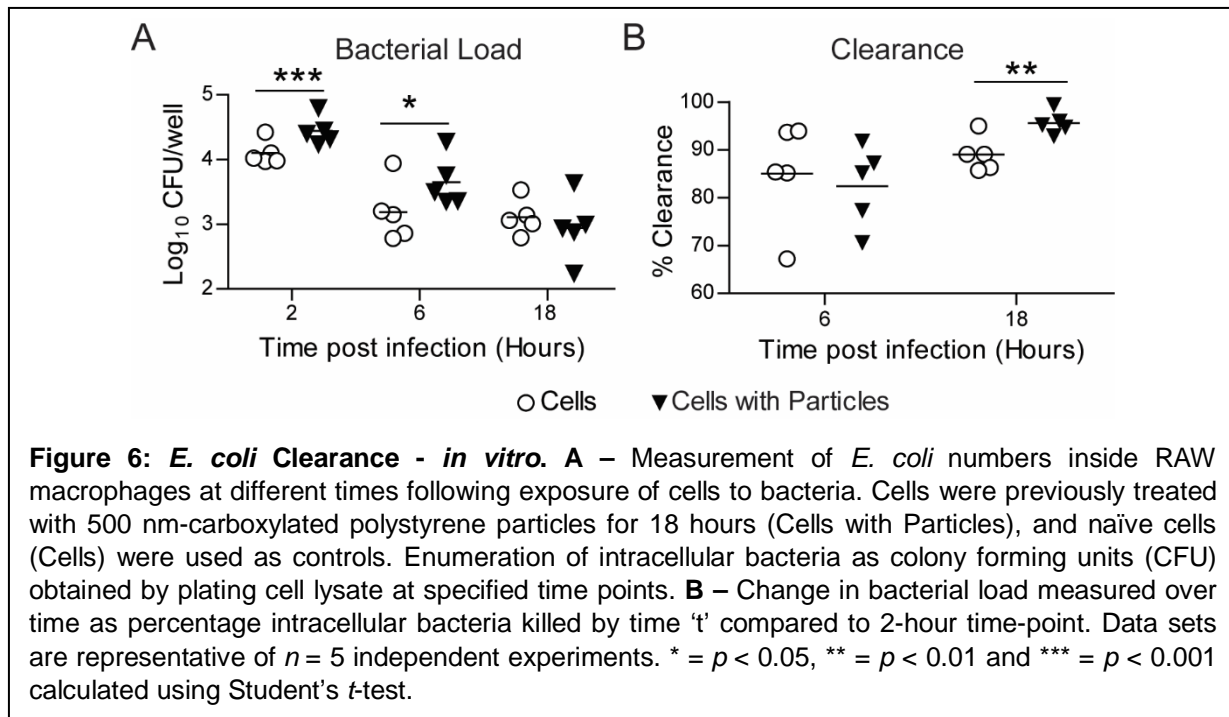

169 not the cell's activation and killing mechanisms such as ROS, NO or cytokine production.

170

### 171 **Phagocytosis of non-stimulatory particles increases the rate of *E. coli* clearance *in vivo***

172 Next, we investigated the effect of particle phagocytosis by immune cells on the bacterial killing  
173 kinetics using an animal model of bacterial infection. For this, particles were injected in C57BL/6  
174 mice via intraperitoneal route 2 hours prior to *E. coli* infection at the same site. Bacterial load  
175 was measured in the peritoneal exudate, within peritoneal exudate cells, and in distant sites  
176 such as the spleen, kidney and liver. Mice injected with particles showed significantly lower  
177 bacterial load in peritoneal exudate cells (intracellular) (Figure 7A) and peritoneal exudate  
178 (Figure 7B) at 6 hours after bacterial injection compared to mice injected with saline followed by  
179 bacteria (controls). Additionally, the bacterial burden was found to be significantly reduced in the

180 spleen (Figure 7C) and lowered but not statistically significant in the kidney (Figure 7D) of mice  
181 injected with particles. In all the mice, we did not detect any bacteria infiltrating the liver.

182  
183 The total number of immune cells in the peritoneal exudate 2 hours after particle injection was  
184 not significantly different from the saline-injected mice, indicating that the faster clearance of  
185 bacteria was not due to increased immune cell infiltration (Supplementary Figure 8). The faster  
186 killing of bacteria could also occur if immune cells are activated in mice prior to administration of  
187 bacteria. Thus, to determine the activation status of immune cells after they have taken up  
188 particles, we compared the expression of various activation markers on isolated mouse  
189 peritoneal macrophages, which had phagocytosed particles, to that of untreated naïve  
190 peritoneal macrophages from the same animals. There was no significant difference in the  
191 expression of CD11b, CD38, CD54, CD62L and CD86 between naïve cells and cells with

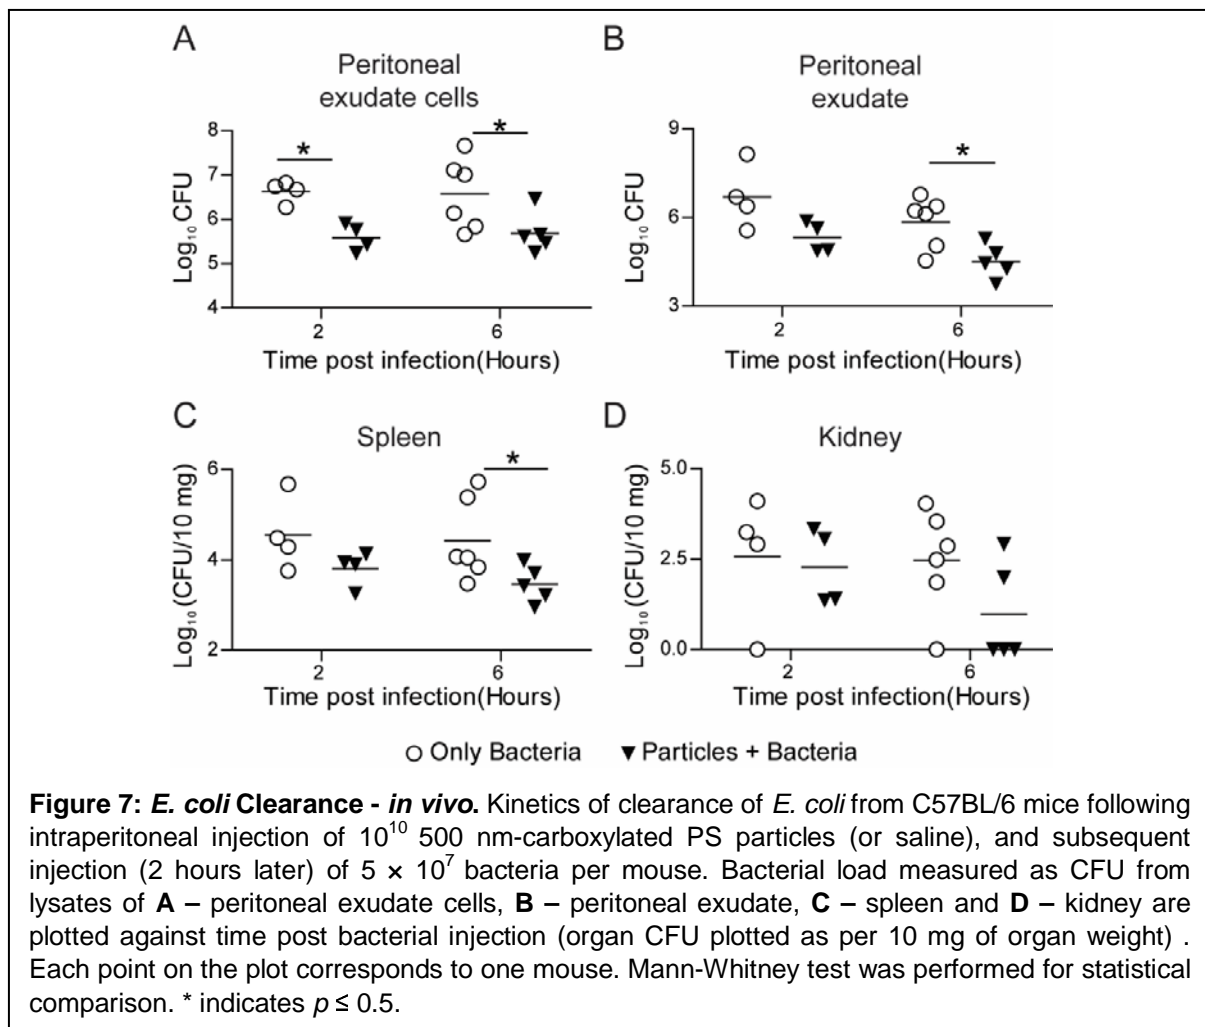

192 particles (Supplementary Figure 9). Together, these data suggest prophylactic particle  
193 administration, which results in enhancing the phagocytic capacity of phagocytes, leads to faster  
194 clearance of *E. coli*.

195

196 **Phagocytosis of non-stimulatory particles increases the rate of *S. epidermidis* clearance**  
197 ***in vivo***

198 As *E. coli* is killed by most phagocytic immune cells, we next chose to use a pathogen that is  
199 primarily killed by a specific phagocytic immune cell. *S. epidermidis*, a nosocomial pathogen  
200 associated with heavy clinical burdens, is primarily neutralized by neutrophils.<sup>29</sup> To investigate if  
201 enhancing the phagocytic ability of immune cells can effectively contain the spread of *S.*  
202 *epidermidis*, we injected particles and bacteria sequentially. Bystander and sequential uptake  
203 were determined in neutrophils, macrophages, and monocytes from the peritoneal cavity  
204 (Supplementary Figure 10). In concurrence with *in vitro* data on enhanced sequential  
205 phagocytosis after particle uptake, our *in vivo* data shows that cells containing particles  
206 phagocytose a higher number of bacteria than cells without particles in the same mouse or  
207 compared to cells in mice that were not injected with particles (particle-naïve mouse) (Figure  
208 8A). Particle-injected mice showed a trend of lower bacterial burden in the peritoneal space  
209 (Figure 8B and 8C). Importantly, in particle-injected mice, we observed that the dissemination of  
210 bacteria to distant organs was significantly lowered, with a complete absence of bacteria in the  
211 kidney (Figure 8D) and close to zero bacteria after 24 hours in the spleen (Figure 8E), as  
212 compared to particle-naïve mice. These data also indicate that prophylactic administration of  
213 non-stimulatory particles results in faster clearance and prevention of bacterial spread.

214

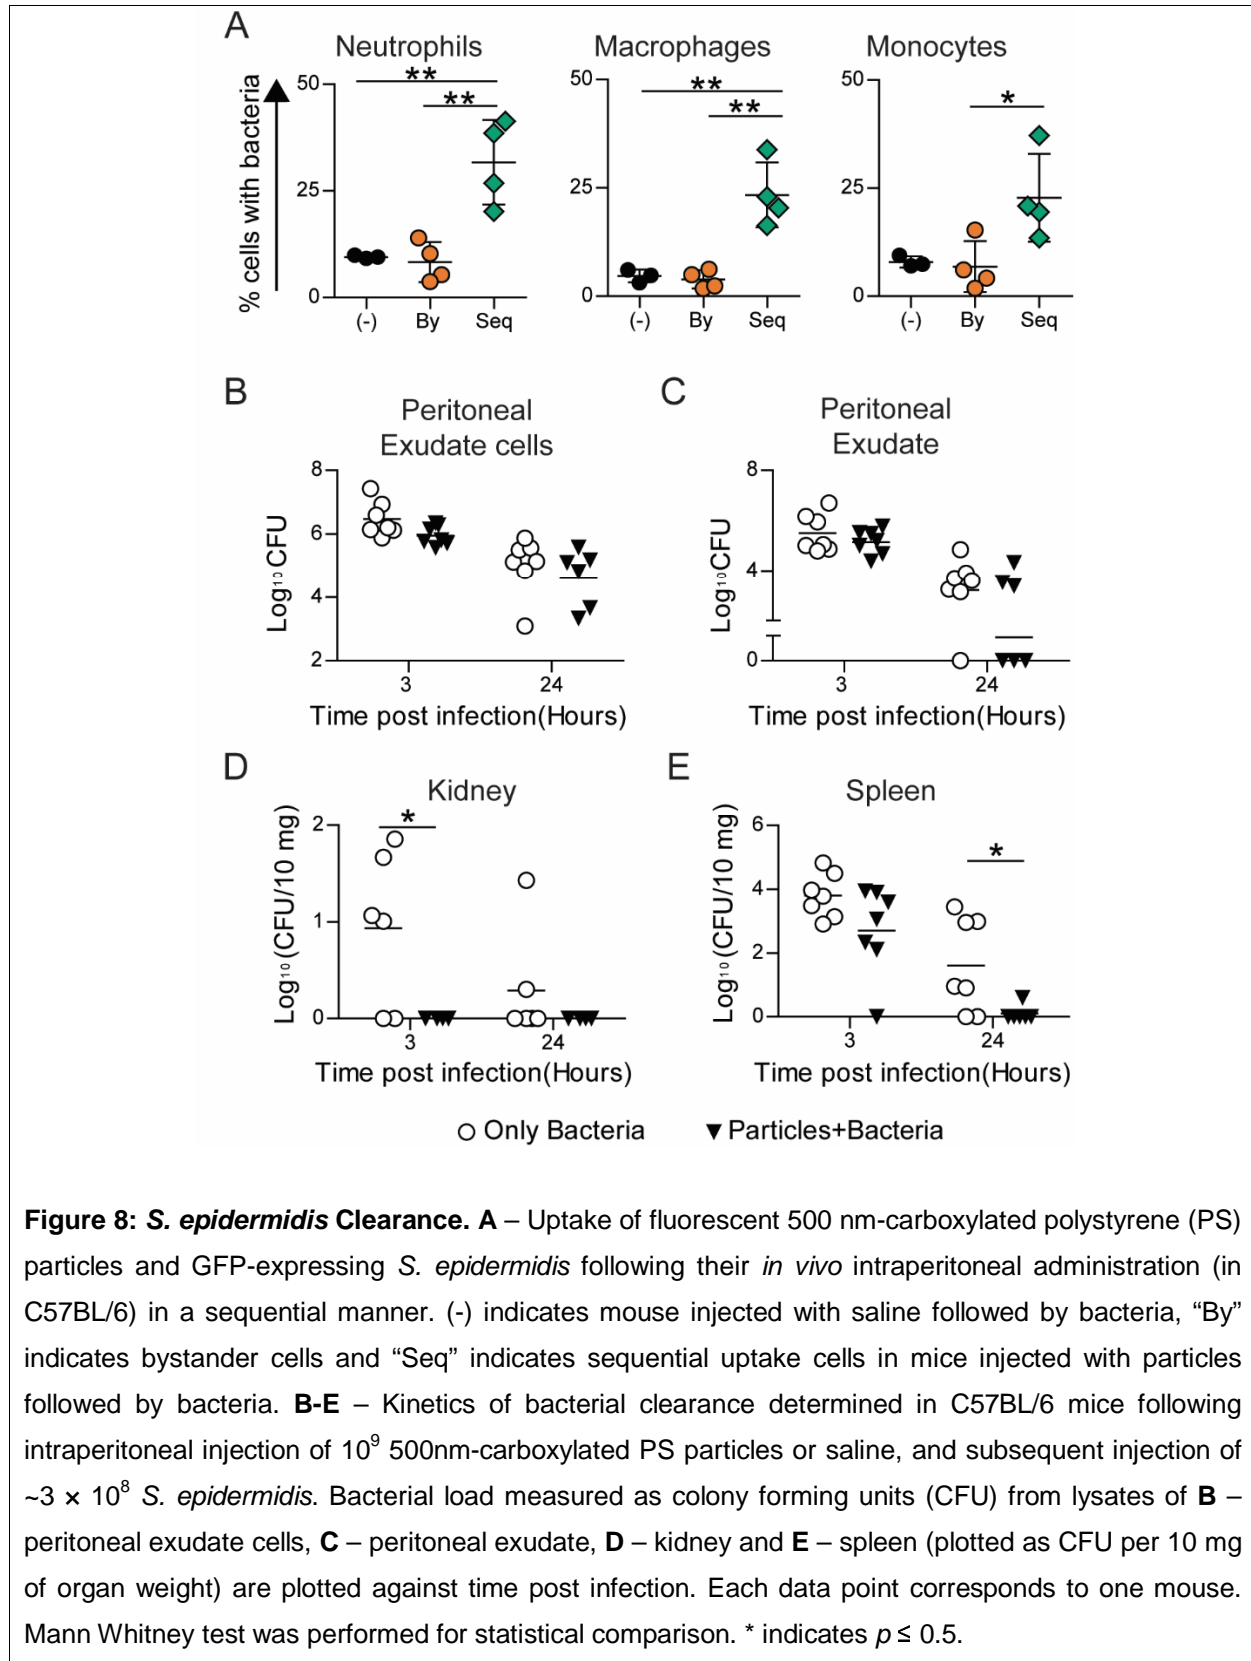



## 216 Discussion

217

218 *In vivo* administration of particles results in a large proportion of them being sequestered by  
219 phagocytic immune cells. A recent meta-analysis of nanoparticle-based cancer therapeutics by  
220 Warren Chan and colleagues showed that only 0.7% of the administered particles reach the  
221 target tumor site in mouse models<sup>30</sup>, implying that most of the particles are sequestered by  
222 phagocytic cells. Even if the particles are degradable, once phagocytosed, they may be  
223 associated with the immune cells for days to weeks.<sup>31,32</sup> Hence, apart from understanding *in*  
224 *cellulo* and *in vivo* fate of the particulates, which is well studied<sup>33-36</sup>, it is crucial to understand  
225 the impact of particulate phagocytosis on the immune cell's functionality.

226

227 A cell's capacity to phagocytose particulates depends on factors such as its polarization state,  
228 expression levels of various proteins associated with phagocytosis, and environmental cues  
229 such as cytokines present in the extracellular milieu.<sup>37,38</sup> A change in any of these factors may  
230 be used to modulate its uptake capacity. For example, stimulating macrophages with LPS or  
231 IFN $\gamma$ , which activate NF- $\kappa$ B, results in heightened phagocytic activity.<sup>22</sup> However, these  
232 methods to modulate phagocytic activity are generally accompanied by other cellular changes,  
233 such as the production of inflammatory cytokines and reactive oxygen and nitrogen species by  
234 M1 phenotypic cells, which is likely to cause damage to surrounding cells and tissues.<sup>39</sup>  
235 Contrasting these conventional methods of cellular activation, we show that monocytes,  
236 macrophages and neutrophils may be driven towards a phenotype that shows enhanced  
237 phagocytic activity without eliciting an inflammatory immune response. This observation is  
238 independent of particle size, is conserved across various phagocytic cell types and is seen in  
239 different organisms, suggestive of its universality.

240

241 Phenotypic and functional heterogeneity among immune cells is now well recognized.<sup>40</sup>  
242 Hellebrekers et al. showed that neutrophils have increased phagocytic capacity following *S.*  
243 *aureus* uptake<sup>25</sup>, while Sachdeva et al.<sup>26</sup> showed that endocytosis increases phagocytic  
244 capacity in macrophage cell lines. Both these studies attributed the increased phagocytosis to  
245 heterogeneity among cells, with a unique highly endocytic/phagocytic cell population  
246 responsible for the increased uptake. While heterogeneity in phagocytic capacity exists, our cell-  
247 sorting data imply that an increase in phagocytic capacity may also be induced. Cells that did  
248 not initially take up particles (bystander cells) show enhanced sequential phagocytosis when  
249 provided with new phagocytic targets in our cell-sorting experiment, suggesting that uptake is

250 able to drive additional phagocytosis. While heterogeneous cells may exist even after cell  
251 sorting, we are unlikely to expect a large proportion of them to be highly phagocytic cells.  
252 Additional proof for uptake-driven increases in phagocytosis comes from the changes we  
253 observe to the fluidity of cell membranes and the Young's modulus of a cell.

254  
255 Modulation of phagocytic immune cell function may prove beneficial for a wide range of  
256 diseases. Generally, such modulation is achieved through therapeutic molecules that may be  
257 delivered with the help of particles. However, a few recent studies have shown that non-  
258 stimulatory cargo-free particles may also reprogram immune cell behavior and have  
259 demonstrated their use in the treatment of conditions such as inflammatory bowel disease,  
260 acute lung injury, sepsis and West Nile infection<sup>41-44</sup>. However, the effects of particles observed  
261 in these studies is thought to be due to the diversion of immune cells away from the  
262 inflammatory site to secondary lymphoid organs. Highlighting the modulation at the cellular  
263 level, our results suggest that phagocytosable cargo-free non-stimulatory particulates may be  
264 used in conditions that are marked by impaired phagocytosis. We demonstrate that one such  
265 application is the increased rate of clearance and reduction in the systemic dissemination of *E.*  
266 *coli* and *S. epidermidis*. Other possible applications could include assisting with clearance of  
267 pathogens from lungs in patients with impaired phagocytic activity<sup>45,46</sup>, faster clearance of  
268 apoptotic cells in inflammatory diseases<sup>47,48</sup> and in improving wound-healing.

269  
270 Finally, it is important to note that the non-stimulatory cargo-free particulates change an immune  
271 cell's phagocytic ability but not killing capacity. So, the strategy of using particulates for faster  
272 bacterial clearance is unlikely to work for pathogens that have active evasion or survival  
273 mechanism. Also, the increase in phagocytic ability is brought about after particle uptake, and  
274 hence the particle administration may only be used for prophylactic treatments and not as a  
275 therapeutic.

276  
277 In conclusion, we show that uptake of particles drives additional phagocytosis in immune cells.  
278 Hence, we may utilize non-stimulatory cargo-free particles to increase the phagocytic ability of  
279 immune cells that could have applications in improving bacterial clearance. The work presented  
280 here also indicates that particles may have unintended effects on the functionality of immune  
281 cells, which should be addressed when evaluating the compatibility of newly designed nano-  
282 and micro-particulates for clinical use.

283

284 **Materials and methods**

285

286 ***In vitro* sequential phagocytosis**

287 RAW 264.7 cells were cultured in DMEM (Lonza, India) supplemented with 10% FBS and 1%  
288 antibiotic-antimycotic solution (Thermo-fisher Scientific, USA). HL-60 cells were cultured in  
289 IMDM (Merck, USA) supplemented with 20% FBS and 1% antibiotic-antimycotic solution. These  
290 cells were induced towards granulocytes (d-HL60) with 1.25% DMSO (Merck), for 3 days. Both  
291 cell lines were seeded at a density of  $2 \times 10^5$  cells per well (of a 24-well plate) and incubated for  
292 2 hours at 37°C under 5% CO<sub>2</sub>. For phagocytosis studies, carboxylated polystyrene (PS)  
293 particles of various sizes (200 nm, 500 nm, 1000 nm and 2900 nm) labeled with different  
294 fluorophores (Dragon-green or Flash-red) were used (Bangs Laboratories, Indiana, USA).  
295 Fluorescent bovine serum albumin (BSA) loaded ~2500 nm-sized Poly(lactic-co-glycolic acid)  
296 (PLGA), and ~2000 nm-sized polycaprolactone (PCL) particles were synthesized using the  
297 double emulsion solvent evaporation method.<sup>49</sup> Silica particles with a diameter of 3000 nm  
298 (Bangs Laboratories) were tagged for fluorescence by adsorbing fluorescently labelled BSA on  
299 the particle surface. For the first round of phagocytosis, particles labeled with fluorophore 1  
300 were added to the cells at different ratios (exact ratios specified in the figure legends). After co-  
301 incubation of cells and particles for various time intervals, media containing free-floating  
302 particles was removed, cells were washed with 1 X PBS to ensure minimal to no residual  
303 particles, and fresh media was added. Cells were then incubated with particles labelled with  
304 fluorophore 2 for a specified time interval. Finally, media was removed, wells washed with 1 X  
305 PBS, cells scraped, stained with 2 µg/ml propidium iodide (PI) solution, and analyzed on a flow  
306 cytometer.

307

308 For experiments involving lipopolysaccharide (LPS) induced cellular activation, RAW cells were  
309 treated with 1 µg/ml of LPS (Merck) for 12-18 hours prior to particle addition. Inhibition of the  
310 TLR-4 pathway was achieved by treating cells with 2 µM TAK-242 (Merck) for 6 hours before  
311 adding particles. For studies involving cell sorting, RAW cells were seeded in a T-25 flask,  
312 incubated with fluorescent PS particles for 2 hours and sorted using BD FACSAria™ Fusion  
313 (Becton Dickinson, USA) equipped with a 488 laser, under a two-way purity sort setting. Post  
314 sorting, particle-positive and particle-negative cells were separately cultured in 24-well tissue  
315 culture plates and allowed to adhere for 2 hours, after which a sequential phagocytosis  
316 experiment was performed as described above for RAW cells.

317

## 318 **Flow cytometry**

319 Experiments involving flow cytometry were performed on BD FACSCelesta™ (Becton  
320 Dickinson) and analyzed using FlowJo (Tree Star, Ashland, OR, USA).

321

## 322 ***Ex vivo* sequential phagocytosis**

323 Studies involving human blood were approved by the Institutional Human Ethics Committee at  
324 the Indian Institute of Science (IISc) (approval number 5-15032017). For the *ex vivo* sequential  
325 phagocytosis experiment, venous blood was collected in EDTA coated tubes, from healthy  
326 volunteers, after obtaining informed consent. PBMCs were isolated using histopaque (Sigma  
327 Aldrich, USA) density gradient centrifugation. In brief, 5 ml of whole blood was carefully laid over  
328 7.5 ml of histopaque and centrifuged at 500 rcf for 20 min (with the brake turned off) at room  
329 temperature. The PBMC layer was collected, and cells were counted, seeded and allowed to  
330 adhere in 24-well cell culture plate for one hour at 37°C under 5% CO<sub>2</sub>. The bottom-most layer  
331 of the density gradient, containing neutrophils and RBCs, was collected separately, and RBCs  
332 were lysed using Ammonium-Chloride-Potassium (ACK) lysis buffer (10 ml lysis buffer per 1 ml  
333 blood for 8 min at room temperature). The lysis reaction was quenched with 10 volumes of 1 X  
334 PBS. The tube was further centrifuged at 400 rcf for 5 min, the supernatant discarded, and the  
335 neutrophil enriched pellet resuspended in DMEM cell culture media. Neutrophils and PBMCs  
336 were counted and seeded in 24-well plates at a density of  $1 \times 10^5$  cells per well. Sequential  
337 phagocytosis experiments were performed as carried out for RAW cells.

338

## 339 **Sequential uptake studies in *Drosophila* hemocytes**

340 Transgenic *hmlΔGal4, UAS-GFP Drosophila* stocks (Bloomington stock number 30142) were  
341 maintained at 25°C on a 12 h light/ 12 h dark-cycle in a medium comprising 8% cornmeal, 4%  
342 sucrose, 2% dextrose, 1.5% yeast extract, 0.8% agar supplemented with 0.4% propionic acid,  
343 0.06% orthophosphoric acid and 0.07% benzoic acid. Twenty 3<sup>rd</sup> instar larvae were dissected,  
344 allowed to bleed into buffer consisting of Ringer's solution and 1 mM phenylthiourea (PTU) for  
345 30 seconds, and passed through a 100 μm mesh to collect single-cell suspension. Sequential  
346 uptake experiments were performed on these cells by incubating them with 3 μm BSA-TRITC  
347 adsorbed PS particles (cell to particle ratio of 1:20) for 2 hours at room temperature, removing  
348 non-phagocytosed particles by centrifugation followed by the addition of 500 nm-carboxylated  
349 PS particles (cell to particle ratio of 1:200) for 2 hours. Finally, the cells were washed, and  
350 hemocytes (identified based on GFP expression) were analyzed on a flow cytometer for particle  
351 uptake.

352

### 353 ***In vivo* sequential phagocytosis**

354 All animal studies were conducted in accordance with the Control and Supervision Rules, 1998  
355 of the Ministry of Environment and Forest Act (Government of India), and the Institutional  
356 Animal Ethics Committee, IISc. Experiments were approved by the Committee for Purpose and  
357 Control and Supervision of Experiments on Animals (permit numbers CAF/ethics/546/2017 and  
358 CAF/ethics/718/2019). Animals were procured from either IISc's breeding facility (BALB/c mice)  
359 or from Hylasco Bio-Technology Pvt Ltd. (a Charles River Laboratories Subsidiary, for C57BL/6  
360 mice). BALB/c or C57BL/6 mice (8–14-week-old) were injected intraperitoneally with  $6 \times 10^6$  500  
361 nm-carboxylated fluorescent PS particles. After 2 hours, mice were injected via the  
362 intraperitoneal route with 500 nm-carboxylated PS particles labelled with a different fluorophore.  
363 Mice were euthanized after 2 hours, and peritoneal exudate was collected by performing  
364 peritoneal lavage and cells stained with Ly6G (clone 1A8) and F4/80 (T45-2342) (BD  
365 Biosciences) for 20 min at 4 °C. Finally, the cells were stained with PI before being run on the  
366 flow cytometer to determine bystander and sequential uptake.

367

### 368 **Reactive Oxygen Species (ROS) assay**

369 ROS produced by immune cells after phagocytosis of PS particles was assessed using an  
370 intracellular probe, Dihydrorhodamine (DHR) 123 (Merck). After the incubation of cells with  
371 particles for 2 and 18 hours, media was removed, and cells were incubated in fresh media  
372 containing 5  $\mu$ M of DHR for 15 min at 37°C. Following this, the probe was quenched with  
373 excess 1 X PBS, cells washed and scraped, stained with PI, and median fluorescence intensity  
374 of cells determined using a flow cytometer. For positive control for ROS production, RAW cells  
375 were stimulated with LPS (1  $\mu$ g/ml) for 12-18 hours.

376

### 377 **Nitric Oxide (NO) assay**

378 For extracellular NO measurement, RAW cells were seeded at a density of  $1 \times 10^5$  cells per well  
379 in a 24-well plate and incubated with PS particles for 36 hours. To determine extracellular NO  
380 production, 50  $\mu$ l aliquot of cell culture supernatant was mixed with 150  $\mu$ l of Griess reagent in a  
381 96-well plate. The amount of  $\text{NO}_2^-$  was determined from a standard curve of Sodium Nitrite. As a  
382 positive control for NO production, cells were stimulated with a combination of LPS (100 ng/ml)  
383 and IFN $\gamma$  (100U/ml) (PeproTech, Israel) for 36-hours.

384

385 For intracellular NO measurement, RAW cells were seeded at a density of  $1 \times 10^5$  cells per well  
386 in a 24-well plate. Cells were incubated with PS particles for 36 hours, following which, media  
387 was removed and, cells were incubated with 5  $\mu$ M 4,5-diaminofluorescein (DAF-2A, Sigma-  
388 Aldrich, USA) for 15 min at 37 °C in dark. The fluorescent probe was quenched with 1 X PBS,  
389 cells were scraped, stained with PI, and fluorescence intensity (corresponding to the amount of  
390 NO present), was measured on a flow cytometer using excitation and an emission wavelength  
391 of 488 and 520 nm, respectively.

392

### 393 **Real-time quantitative PCR (RT-qPCR) Assays**

394 RAW cells,  $4 \times 10^5$  per well, were seeded in a 24-well plate and allowed to adhere for 2 hours.  
395 Cells were treated with 500 nm-carboxylated PS particles or LPS (1  $\mu$ g/ml) for 18 hours in  
396 triplicates. After incubation, cells were lysed with 1 ml of TRIzol reagent (ThermoFisher  
397 Scientific) and total RNA extracted from cells using RNeasy Mini Kits (Qiagen, USA) and  
398 reverse transcribed to complementary DNA (cDNA) using iSCRIPT cDNA synthesis kit (Bio-  
399 Rad, USA) as per the manufacturer's protocol. The cDNA was analyzed for gene expression  
400 using TB Green *Premix Ex Taq I* (Takara Bio Inc., Japan). The RNA expression levels were  
401 normalized to the levels of the house-keeping gene, glyceraldehyde 3-phosphate  
402 dehydrogenase (*Gapdh*). Sequences of primers used for amplification of human genes are  
403 shown in Supplementary Table1.

404

### 405 **Membrane fluidity measurements using Laurdan**

406 RAW cells,  $75 \times 10^3$  per well, were seeded in a 96-well black flat-bottom polystyrene plate and  
407 allowed to adhere overnight. Cells were incubated with 500 nm-carboxylated PS particles at a  
408 cell to particle ratio of 1:50 or 1:200 for 2 hours. As a positive control, cells were treated with 66  
409  $\mu$ M Methyl- $\beta$ -cyclodextrin (M $\beta$ CD) (Merck, USA) for 1 hour. After incubation, media was  
410 removed, wells washed with 1 X PBS and incubated with 50  $\mu$ L of incomplete media containing  
411 5  $\mu$ M Laurdan (Avanti® Polar Lipids, Merck, USA) for 30 min at 37°C. Fluorescence was  
412 measured with a microplate reader (Tecan, Switzerland). Emission intensity was acquired at  
413 440 and 490 nm (excitation=385 nm, 5 nm bandpass) at 37 °C. Generalized  
414 polarization<sup>50</sup>(GP<sub>laurdan</sub>) was calculated from the emission intensities using the following  
415 equation:

$$416 \quad GP_{\text{laurdan}} = \frac{I_{440} - I_{490}}{I_{440} + I_{490}}$$

417  $I_{440}$  and  $I_{490}$  represent the fluorescence intensity emitted at 440 nm and 490 nm, respectively.



418

### 419 **Analysis of cellular stiffness using atomic force microscopy (AFM)**

420 RAW cells were seeded at a density of  $2 \times 10^5$  cells per ml in a 35-mm cell culture dish and  
421 allowed to adhere overnight. Particles were added to cells at a ratio of 1:200 for 2 hours to  
422 ensure uptake by >95 % cells. Extracellular particles were removed by washing twice with 1 X  
423 PBS and cells maintained in DMEM with 10% FBS for AFM measurements. The apparent  
424 modulus of elasticity of the cells was measured using an Atomic Force Microscope (XE Bio from  
425 Park Systems, Suwon, South Korea) using a V-shaped cantilever (stiffness 0.041 N/m as  
426 measured using thermal tuning) with a spherical bead of diameter 5.2  $\mu\text{m}$  made of silicon  
427 dioxide (AppNano HYDRA6V-200NG-TL; AppNano, Mountain View, CA). One force-  
428 displacement (F-d) curve was obtained per cell for a total of approximately 20 cells in each of  
429 the three independent experiments. The force curve corresponding to the approach of the tip  
430 towards the substrate was measured, and a constant indentation depth of 200 nm was  
431 maintained. Each of these F-d curves was analyzed to obtain the apparent modulus of elasticity  
432 of the cell using the Hertzian contact model.<sup>51</sup>

433

### 434 ***In vitro* Bactericidal assays**

435 RAW cells were seeded at a density of  $1 \times 10^5$  cells per well in a 48-well plate and incubated  
436 with 500 nm-carboxylated PS particles, in triplicates, for 18 hours. The cell to particle ratio was  
437 1:50, which was optimized (by testing multiple cells to particle ratios – data not shown) to obtain  
438 more than 90% for cells with particles. Simultaneously, *E. coli* K12 MG1655 or *Salmonella*  
439 *enterica* serovar Typhimurium (*S. Typhimurium*) cultures were grown in Luria-Bertani (LB)  
440 media at 37 °C till the late log phase (10 hours). The bacterial load was confirmed by plating the  
441 cultures on LB-agar plates and enumerating the colony-forming units (CFU). Antibiotic-free  
442 DMEM cell culture media was used for further steps in the experiment. After incubating cells  
443 with particles, the wells were washed with 1 X PBS to remove non-phagocytosed particles.  
444 Bacteria were then added to the cells at the desired multiplicity of infection (MOI), and the plate  
445 was centrifuged at 400 rcf for 5 min to allow the bacteria to settle. The plate was incubated at  
446 37°C under 5% CO<sub>2</sub> for one hour to allow phagocytosis of bacteria by RAW cells. After this,  
447 media was removed, wells washed with 1 X PBS, and cells were further incubated in media  
448 containing 100  $\mu\text{g/ml}$  gentamicin (HiMedia Laboratories, India) for one hour to kill extracellular  
449 bacteria. The viable bacteria inside RAW cells at different time points post-infection were  
450 enumerated by lysing the cells with 0.1% Triton X-100 for 10 min and plating the cell lysates on  
451 LB-Agar plates to determine bacterial CFU. For all time points beyond 2 hours post-infection,

452 wells were washed with 1 X PBS and cells were maintained in media containing 25 µg/ml of  
453 gentamicin.

454

455

#### 456 ***In vivo* killing assays-*E. coli***

457 C57BL/6 mice (weighing 20 – 30 grams, 8-14-week-old) were injected intraperitoneally  $1 \times 10^{10}$   
458 500 nm-carboxylated PS particles. Control mice were injected with saline. After 2 hours, mice  
459 were injected intraperitoneally with  $\sim 5 \times 10^7$  *E. coli*. Next, 2- or 6- hours of bacterial injection,  
460 mice were euthanized, peritoneal lavage performed with 5 ml of ice-cold PBS-EDTA, and  
461 peritoneal exudates collected. The peritoneal exudate cells were stained for live dead using  
462 Zombie Aqua Fixable Viability dye (BD Biosciences), fixed with 1.6% paraformaldehyde (PFA),  
463 and finally stained with the following antibodies for 20 min at 4 °C: Ly6G (1A8), Ly6C (AL-21),  
464 CD11b (M1/70) and F4/80 (T45-2342) and analyzed on a flow cytometer. Further, mice were  
465 dissected after peritoneal lavage to collect spleen, kidney, and liver. The organs were  
466 mechanically homogenized in 1 X PBS containing 0.1 % Triton X-100 using a pestle. Serial  
467 dilutions of each lysate were plated on LB agar plates and incubated overnight at 37 °C. CFU  
468 obtained were enumerated to determine the bacterial load for each organ.

469

#### 470 ***In vivo* killing assays-*S. epidermidis***

471 *S. epidermidis*: sGFP expressing plasmid (pTH100-Addgene plasmid #84458)<sup>52</sup> was  
472 transformed into *E. coli* DC10B cells.<sup>53</sup> Plasmids extracted from DC10B cells were  
473 electroporated into *S. epidermidis* (ATCC122293) strain. The cells were plated onto Tryptic soya  
474 agar (TSA) plates containing 10 µg/ml chloramphenicol and incubated at 30°C for 24 hours.  
475 Fluorescent green colonies were picked for further experiments.

476

477 C57BL/6 mice (weighing 20 – 30 grams, 8-14-week-old) were injected intraperitoneally with  $1 \times$   
478  $10^9$  500 nm-carboxylated PS particles. Control mice were injected with saline. After 2 hours,  
479 mice were injected intraperitoneally with  $\sim 3 \times 10^8$  *S. epidermidis*. After 3- or 24 hours of *S.*  
480 *epidermidis* injection, mice were euthanized, peritoneal lavage performed with 5 ml of ice-cold  
481 PBS-EDTA, and peritoneal exudates collected. The peritoneal exudate cells were stained for  
482 live dead using Zombie Aqua Fixable Viability dye (BD Biosciences (USA), fixed with 1.6% PFA,  
483 and finally stained with the following antibodies for 20 min at 4 °C: CD11b (M1/70), F4/80 (T45-  
484 2342) Ly6G (1A8), Ly6C (AL-21), and analyzed on a flow cytometer. Further, mice were  
485 dissected after peritoneal lavage to collect spleen, kidney, and liver. The organs were

486 mechanically homogenized in 1 X PBS containing 0.1 % TritonX-100 using a pestle. Serial  
487 dilutions of each lysate were plated on Tryptic Soya agar plates and incubated overnight at 37  
488 °C. CFU obtained were enumerated to determine the bacterial load for each organ.

489

#### 490 **Expression of activation markers on peritoneal macrophages**

491 C57BL/6 mice were euthanized, and peritoneal lavage was performed with 5 ml of ice-cold  
492 PBS-EDTA. Peritoneal exudates were centrifuged at 400 rcf for 5 min, and the cell pellet was  
493 resuspended in DMEM complete media. Cells were counted using a hemocytometer.  $5 \times 10^5$   
494 cells were seeded in each well of a 6-well plate and incubated at 37°C for 2 hours to allow  
495 peritoneal macrophages to adhere. Non-adhered cells were removed by washing the wells  
496 thrice with 1 X PBS. Fluorescent-labeled 500 nm-carboxylated PS particles were added to cells  
497 at a ratio of 1:100 (low) or 1:1000 (high) and incubated for 2 hours. Cells were washed with ice  
498 cold PBS-EDTA (three times), scraped and collected in FACS tubes, and stained using Zombie  
499 Aqua Fixable Viability dye. Finally, cells were stained with a combination of the following  
500 antibodies for 30 mins at 4°C: CD11b (M1/70), CD38 (90), CD54 (3E2), CD62L (MEL-14), CD86  
501 (GL-1), F4/80 (T45-2342) and Ly6C (AL-21) (BD Biosciences). The expression of activation  
502 markers was determined using a flow cytometer.

503

#### 504 **Statistics**

505 At least three independent experiments were performed (unless explicitly stated differently), and  
506 data from biological duplicates of a single independent experiment are reported through a single  
507 mean value. For data involving comparisons between 2 groups, Student's *t*-test or Mann-  
508 Whitney test or Welch's *t*-test were used. For data involving comparisons between multiple  
509 groups, one-way ANOVA followed by the Bonferroni *post-hoc* test was used for statistical  
510 comparisons.

511

512 **Acknowledgements:** We thank Monisha for assistance with the atomic force microscope. We  
513 acknowledge the support of the staff at the central animal facility and flow cytometry facility,  
514 IISc. This work was supported by the DBT/Wellcome Trust India Alliance Fellowship [grant  
515 number IA/I/19/1/504265] awarded to SJ. This work was partly supported by a Science and  
516 Engineering Board, Department of Science and Technology, Govt. of India [grant number  
517 ECR/2016/000629] to SJ. This work was also partly supported by the R. I. Mazumdar young  
518 investigator fellowship at the Indian Institute of Science. PS is supported by a research  
519 fellowship from University Grants Commission, Govt. of India.

520

521 **References:**

522

- 523 (1) Mosser, D. M.; Hamidzadeh, K.; Goncalves, R. Macrophages and the Maintenance of  
524 Homeostasis. *Cellular & Molecular Immunology* **2021**, *18* (3), 579–587.  
525 <https://doi.org/10.1038/s41423-020-00541-3>.
- 526 (2) Nicolás-Ávila, J. Á.; Adrover, J. M.; Hidalgo, A. Neutrophils in Homeostasis, Immunity, and Cancer.  
527 *Immunity* **2017**, *46* (1), 15–28. <https://doi.org/10.1016/j.immuni.2016.12.012>.
- 528 (3) Gordon, S. Phagocytosis: An Immunobiologic Process. *Immunity* **2016**, *44* (3), 463–475.  
529 <https://doi.org/10.1016/j.immuni.2016.02.026>.
- 530 (4) Gustafson, H. H.; Holt-Casper, D.; Grainger, D. W.; Ghandehari, H. Nanoparticle Uptake: The  
531 Phagocyte Problem. *Nano Today* **2015**, *10* (4), 487–510.  
532 <https://doi.org/10.1016/j.nantod.2015.06.006>.
- 533 (5) Hu, M.; Palić, D. Micro- and Nano-Plastics Activation of Oxidative and Inflammatory Adverse  
534 Outcome Pathways. *Redox Biology* **2020**, *37*, 101620.  
535 <https://doi.org/10.1016/j.redox.2020.101620>.
- 536 (6) Kaufmann, S. H. E.; Dorhoi, A. Molecular Determinants in Phagocyte-Bacteria Interactions.  
537 *Immunity* **2016**, *44* (3), 476–491. <https://doi.org/10.1016/j.immuni.2016.02.014>.
- 538 (7) Zanganeh, S.; Hutter, G.; Spitler, R.; Lenkov, O.; Mahmoudi, M.; Shaw, A.; Pajarinen, J. S.;  
539 Nejadnik, H.; Goodman, S.; Moseley, M.; Coussens, L. M.; Daldrup-Link, H. E. Iron Oxide  
540 Nanoparticles Inhibit Tumour Growth by Inducing Pro-Inflammatory Macrophage Polarization in  
541 Tumour Tissues. *Nat Nanotechnol* **2016**, *11* (11), 986–994.  
542 <https://doi.org/10.1038/nnano.2016.168>.
- 543 (8) Miao, X.; Leng, X.; Zhang, Q. The Current State of Nanoparticle-Induced Macrophage Polarization  
544 and Reprogramming Research. *Int J Mol Sci* **2017**, *18* (2). <https://doi.org/10.3390/ijms18020336>.
- 545 (9) Laskar, A.; Eilertsen, J.; Li, W.; Yuan, X.-M. SPION Primes THP1 Derived M2 Macrophages towards  
546 M1-like Macrophages. *Biochemical and Biophysical Research Communications* **2013**, *441* (4),  
547 737–742. <https://doi.org/10.1016/j.bbrc.2013.10.115>.
- 548 (10) Casey, L. M.; Kakade, S.; Decker, J. T.; Rose, J. A.; Deans, K.; Shea, L. D.; Pearson, R. M. Cargo-Less  
549 Nanoparticles Program Innate Immune Cell Responses to Toll-like Receptor Activation.  
550 *Biomaterials* **2019**, *218*, 119333. <https://doi.org/10.1016/j.biomaterials.2019.119333>.
- 551 (11) Fuchs, A.-K.; Syrovets, T.; Haas, K. A.; Loos, C.; Musyanovych, A.; Mailänder, V.; Landfester, K.;  
552 Simmet, T. Carboxyl- and Amino-Functionalized Polystyrene Nanoparticles Differentially Affect  
553 the Polarization Profile of M1 and M2 Macrophage Subsets. *Biomaterials* **2016**, *85*, 78–87.  
554 <https://doi.org/10.1016/j.biomaterials.2016.01.064>.
- 555 (12) Huang, Y.-J.; Hung, K.-C.; Hung, H.-S.; Hsu, S. Modulation of Macrophage Phenotype by  
556 Biodegradable Polyurethane Nanoparticles: Possible Relation between Macrophage Polarization  
557 and Immune Response of Nanoparticles. *ACS Appl. Mater. Interfaces* **2018**, *10* (23), 19436–19448.  
558 <https://doi.org/10.1021/acsami.8b04718>.
- 559 (13) Garcia, G.; Kim, M.-H.; Morikis, V. A.; Simon, S. I. Neutrophil Inflammatory Response Is  
560 Downregulated by Uptake of Superparamagnetic Iron Oxide Nanoparticle Therapeutics. *Front.*  
561 *Immunol.* **2020**, *11*. <https://doi.org/10.3389/fimmu.2020.571489>.
- 562 (14) Hwang, J.; Choi, D.; Han, S.; Jung, S. Y.; Choi, J.; Hong, J. Potential Toxicity of Polystyrene  
563 Microplastic Particles. *Scientific Reports* **2020**, *10* (1), 7391. <https://doi.org/10.1038/s41598-020-64464-9>.
- 564 (15) Kusaka, T.; Nakayama, M.; Nakamura, K.; Ishimiya, M.; Furusawa, E.; Ogasawara, K. Effect of Silica  
565 Particle Size on Macrophage Inflammatory Responses. *PLOS ONE* **2014**, *9* (3), e92634.  
566 <https://doi.org/10.1371/journal.pone.0092634>.
- 567

- 568 (16) Chou, C.-C.; Chen, W.; Hung, Y.; Mou, C.-Y. Molecular Elucidation of Biological Response to  
569 Mesoporous Silica Nanoparticles In Vitro and In Vivo. *ACS Appl. Mater. Interfaces* **2017**, *9* (27),  
570 22235–22251. <https://doi.org/10.1021/acsami.7b05359>.
- 571 (17) Jayaram, D. T.; Kumar, A.; Kippner, L. E.; Ho, P.-Y.; Kemp, M. L.; Fan, Y.; Payne, C. K. TiO<sub>2</sub>  
572 Nanoparticles Generate Superoxide and Alter Gene Expression in Human Lung Cells. *RSC Adv.*  
573 **2019**, *9* (43), 25039–25047. <https://doi.org/10.1039/C9RA04037D>.
- 574 (18) Wang, M.; Li, J.; Dong, S.; Cai, X.; Simaiti, A.; Yang, X.; Zhu, X.; Luo, J.; Jiang, L.-H.; Du, B.; Yu, P.;  
575 Yang, W. Silica Nanoparticles Induce Lung Inflammation in Mice via ROS/PARP/TRPM2 Signaling-  
576 Mediated Lysosome Impairment and Autophagy Dysfunction. *Particle and Fibre Toxicology* **2020**,  
577 *17* (1), 23. <https://doi.org/10.1186/s12989-020-00353-3>.
- 578 (19) Attarilar, S.; Yang, J.; Ebrahimi, M.; Wang, Q.; Liu, J.; Tang, Y.; Yang, J. The Toxicity Phenomenon  
579 and the Related Occurrence in Metal and Metal Oxide Nanoparticles: A Brief Review From the  
580 Biomedical Perspective. *Front. Bioeng. Biotechnol.* **2020**, *8*.  
581 <https://doi.org/10.3389/fbioe.2020.00822>.
- 582 (20) Gaharwar, U. S.; Kumar, S.; Rajamani, P. Iron Oxide Nanoparticle-Induced Hematopoietic and  
583 Immunological Response in Rats. *RSC Adv.* **2020**, *10* (59), 35753–35764.  
584 <https://doi.org/10.1039/D0RA05901C>.
- 585 (21) Liu, Y.; Hardie, J.; Zhang, X.; Rotello, V. M. Effects of Engineered Nanoparticles on the Innate  
586 Immune System. *Seminars in Immunology* **2017**, *34*, 25–32.  
587 <https://doi.org/10.1016/j.smim.2017.09.011>.
- 588 (22) Islam, M. A.; Pröll, M.; Hölker, M.; Tholen, E.; Tesfaye, D.; Looft, C.; Schellander, K.; Cinar, M. U.  
589 Alveolar Macrophage Phagocytic Activity Is Enhanced with LPS Priming, and Combined  
590 Stimulation of LPS and Lipoteichoic Acid Synergistically Induce pro-Inflammatory Cytokines in  
591 Pigs. *Innate Immun* **2013**, *19* (6), 631–643. <https://doi.org/10.1177/1753425913477166>.
- 592 (23) Matsunaga, N.; Tsuchimori, N.; Matsumoto, T.; Ii, M. TAK-242 (Resatorvid), a Small-Molecule  
593 Inhibitor of Toll-like Receptor (TLR) 4 Signaling, Binds Selectively to TLR4 and Interferes with  
594 Interactions between TLR4 and Its Adaptor Molecules. *Mol Pharmacol* **2011**, *79* (1), 34–41.  
595 <https://doi.org/10.1124/mol.110.068064>.
- 596 (24) Andreakos, E.; Sacre, S. M.; Smith, C.; Lundberg, A.; Kiriakidis, S.; Stonehouse, T.; Monaco, C.;  
597 Feldmann, M.; Foxwell, B. M. Distinct Pathways of LPS-Induced NF-κB Activation and Cytokine  
598 Production in Human Myeloid and Nonmyeloid Cells Defined by Selective Utilization of MyD88  
599 and Mal/TIRAP. *Blood* **2004**, *103* (6), 2229–2237. <https://doi.org/10.1182/blood-2003-04-1356>.
- 600 (25) Hellebrekers, P.; Hietbrink, F.; Vrisekoop, N.; Leenen, L. P. H.; Koenderman, L. Neutrophil  
601 Functional Heterogeneity: Identification of Competitive Phagocytosis. *Front. Immunol.* **2017**, *8*.  
602 <https://doi.org/10.3389/fimmu.2017.01498>.
- 603 (26) Sachdeva, K.; Goel, M.; Sundaramurthy, V. Heterogeneity in the Endocytic Capacity of Individual  
604 Macrophage in a Population Determines Its Subsequent Phagocytosis, Infectivity and Subcellular  
605 Trafficking. *Traffic* **2020**, *21* (8), 522–533. <https://doi.org/10.1111/tra.12752>.
- 606 (27) Schumann, J. It Is All about Fluidity: Fatty Acids and Macrophage Phagocytosis. *European Journal*  
607 *of Pharmacology* **2016**, *785*, 18–23. <https://doi.org/10.1016/j.ejphar.2015.04.057>.
- 608 (28) Erwig, L. P.; Gow, N. A. R. Interactions of Fungal Pathogens with Phagocytes. *Nature Reviews*  
609 *Microbiology* **2016**, *14* (3), 163–176. <https://doi.org/10.1038/nrmicro.2015.21>.
- 610 (29) Spaan, A. N.; Surewaard, B. G. J.; Nijland, R.; van Strijp, J. A. G. Neutrophils Versus Staphylococcus  
611 Aureus: A Biological Tug of War. *Annual Review of Microbiology* **2013**, *67* (1), 629–650.  
612 <https://doi.org/10.1146/annurev-micro-092412-155746>.
- 613 (30) Wilhelm, S.; Tavares, A. J.; Dai, Q.; Ohta, S.; Audet, J.; Dvorak, H. F.; Chan, W. C. W. Analysis of  
614 Nanoparticle Delivery to Tumours. *Nature Reviews Materials* **2016**, *1* (5), 16014.  
615 <https://doi.org/10.1038/natrevmats.2016.14>.



- 616 (31) Gad, S. C.; Sharp, K. L.; Montgomery, C.; Payne, J. D.; Goodrich, G. P. Evaluation of the Toxicity of  
617 Intravenous Delivery of Auroshell Particles (Gold–Silica Nanoshells). *Int J Toxicol* **2012**, *31* (6),  
618 584–594. <https://doi.org/10.1177/1091581812465969>.
- 619 (32) Cho, M.; Cho, W.-S.; Choi, M.; Kim, S. J.; Han, B. S.; Kim, S. H.; Kim, H. O.; Sheen, Y. Y.; Jeong, J.  
620 The Impact of Size on Tissue Distribution and Elimination by Single Intravenous Injection of Silica  
621 Nanoparticles. *Toxicology Letters* **2009**, *189* (3), 177–183.  
622 <https://doi.org/10.1016/j.toxlet.2009.04.017>.
- 623 (33) Hadipour Moghaddam, S. P.; Mohammadpour, R.; Ghandehari, H. In Vitro and in Vivo Evaluation  
624 of Degradation, Toxicity, Biodistribution, and Clearance of Silica Nanoparticles as a Function of  
625 Size, Porosity, Density, and Composition. *Journal of Controlled Release* **2019**, *311–312*, 1–15.  
626 <https://doi.org/10.1016/j.jconrel.2019.08.028>.
- 627 (34) Su, C.; Liu, Y.; Li, R.; Wu, W.; Fawcett, J. P.; Gu, J. Absorption, Distribution, Metabolism and  
628 Excretion of the Biomaterials Used in Nanocarrier Drug Delivery Systems. *Advanced Drug Delivery*  
629 *Reviews* **2019**, *143*, 97–114. <https://doi.org/10.1016/j.addr.2019.06.008>.
- 630 (35) Zhang, A.; Meng, K.; Liu, Y.; Pan, Y.; Qu, W.; Chen, D.; Xie, S. Absorption, Distribution,  
631 Metabolism, and Excretion of Nanocarriers in Vivo and Their Influences. *Advances in Colloid and*  
632 *Interface Science* **2020**, *284*, 102261. <https://doi.org/10.1016/j.cis.2020.102261>.
- 633 (36) Bourquin, J.; Milosevic, A.; Hauser, D.; Lehner, R.; Blank, F.; Petri-Fink, A.; Rothen-Rutishauser, B.  
634 Biodistribution, Clearance, and Long-Term Fate of Clinically Relevant Nanomaterials. *Advanced*  
635 *Materials* **2018**, *30* (19), 1704307. <https://doi.org/10.1002/adma.201704307>.
- 636 (37) Martinez, F. O.; Gordon, S. The M1 and M2 Paradigm of Macrophage Activation: Time for  
637 Reassessment. *F1000Prime Rep* **2014**, *6*. <https://doi.org/10.12703/P6-13>.
- 638 (38) Orecchioni, M.; Ghosheh, Y.; Pramod, A. B.; Ley, K. Macrophage Polarization: Different Gene  
639 Signatures in M1(LPS+) vs. Classically and M2(LPS-) vs. Alternatively Activated Macrophages.  
640 *Front. Immunol.* **2019**, *10*. <https://doi.org/10.3389/fimmu.2019.01084>.
- 641 (39) Rayees, S.; Rochford, I.; Joshi, J. C.; Joshi, B.; Banerjee, S.; Mehta, D. Macrophage TLR4 and PAR2  
642 Signaling: Role in Regulating Vascular Inflammatory Injury and Repair. *Front. Immunol.* **2020**, *11*.  
643 <https://doi.org/10.3389/fimmu.2020.02091>.
- 644 (40) A-Gonzalez, N.; Quintana, J. A.; García-Silva, S.; Mazariegos, M.; González de la Aleja, A.; Nicolás-  
645 Ávila, J. A.; Walter, W.; Adrover, J. M.; Crainiciuc, G.; Kuchroo, V. K.; Rothlin, C. V.; Peinado, H.;  
646 Castrillo, A.; Ricote, M.; Hidalgo, A. Phagocytosis Imprints Heterogeneity in Tissue-Resident  
647 Macrophages. *J Exp Med* **2017**, *214* (5), 1281–1296. <https://doi.org/10.1084/jem.20161375>.
- 648 (41) Casey, L. M.; Kakade, S.; Decker, J. T.; Rose, J. A.; Deans, K.; Shea, L. D.; Pearson, R. M. Cargo-Less  
649 Nanoparticles Program Innate Immune Cell Responses to Toll-like Receptor Activation.  
650 *Biomaterials* **2019**, *218*, 119333. <https://doi.org/10.1016/j.biomaterials.2019.119333>.
- 651 (42) Fromen, C. A.; Kelley, W. J.; Fish, M. B.; Adili, R.; Noble, J.; Hoenerhoff, M. J.; Holinstat, M.; Eniola-  
652 Adefeso, O. Neutrophil–Particle Interactions in Blood Circulation Drive Particle Clearance and  
653 Alter Neutrophil Responses in Acute Inflammation. *ACS Nano* **2017**, *11* (11), 10797–10807.  
654 <https://doi.org/10.1021/acsnano.7b03190>.
- 655 (43) Getts, D. R.; Terry, R. L.; Getts, M. T.; Deffrasnes, C.; Müller, M.; van Vreden, C.; Ashhurst, T. M.;  
656 Chami, B.; McCarthy, D.; Wu, H.; Ma, J.; Martin, A.; Shae, L. D.; Witting, P.; Kansas, G. S.; Kühn, J.;  
657 Hafezi, W.; Campbell, I. L.; Reilly, D.; Say, J.; Brown, L.; White, M. Y.; Cordwell, S. J.; Chadban, S. J.;  
658 Thorp, E. B.; Bao, S.; Miller, S. D.; King, N. J. C. Therapeutic Inflammatory Monocyte Modulation  
659 Using Immune-Modifying Microparticles. *Sci Transl Med* **2014**, *6* (219), 219ra7.  
660 <https://doi.org/10.1126/scitranslmed.3007563>.
- 661 (44) Saito, E.; Kuo, R.; Pearson, R. M.; Gohel, N.; Cheung, B.; King, N. J. C.; Miller, S. D.; Shea, L. D.  
662 Designing Drug-Free Biodegradable Nanoparticles to Modulate Inflammatory Monocytes and

- 663 Neutrophils for Ameliorating Inflammation. *Journal of Controlled Release* **2019**, *300*, 185–196.  
664 <https://doi.org/10.1016/j.jconrel.2019.02.025>.
- 665 (45) Berenson, C. S.; Garlipp, M. A.; Grove, L. J.; Maloney, J.; Sethi, S. Impaired Phagocytosis of  
666 Nontypeable Haemophilus Influenzae by Human Alveolar Macrophages in Chronic Obstructive  
667 Pulmonary Disease. *The Journal of Infectious Diseases* **2006**, *194* (10), 1375–1384.  
668 <https://doi.org/10.1086/508428>.
- 669 (46) Fitzpatrick, A. M.; Holguin, F.; Teague, W. G.; Brown, L. A. S. Alveolar Macrophage Phagocytosis Is  
670 Impaired in Children with Poorly Controlled Asthma. *Journal of Allergy and Clinical Immunology*  
671 **2008**, *121* (6), 1372–1378.e3. <https://doi.org/10.1016/j.jaci.2008.03.008>.
- 672 (47) Schrijvers, D. M.; De Meyer, G. R. Y.; Kockx, M. M.; Herman, A. G.; Martinet, W. Phagocytosis of  
673 Apoptotic Cells by Macrophages Is Impaired in Atherosclerosis. *Arteriosclerosis, Thrombosis, and*  
674 *Vascular Biology* **2005**, *25* (6), 1256–1261.  
675 <https://doi.org/10.1161/01.ATV.0000166517.18801.a7>.
- 676 (48) Szondy, Z.; Garabuczi, É.; Joós, G.; Tsay, G. J.; Sarang, Z. Impaired Clearance of Apoptotic Cells in  
677 Chronic Inflammatory Diseases: Therapeutic Implications. *Front Immunol* **2014**, *5*.  
678 <https://doi.org/10.3389/fimmu.2014.00354>.
- 679 (49) Jhunjhunwala, S.; Balmert, S. C.; Raimondi, G.; Dons, E.; Nichols, E. E.; Thomson, A. W.; Little, S. R.  
680 Controlled Release Formulations of IL-2, TGF-β1 and Rapamycin for the Induction of Regulatory T  
681 Cells. *J Control Release* **2012**, *159* (1), 78–84. <https://doi.org/10.1016/j.jconrel.2012.01.013>.
- 682 (50) Parasassi, T.; De Stasio, G.; Ravagnan, G.; Rusch, R. M.; Gratton, E. Quantitation of Lipid Phases in  
683 Phospholipid Vesicles by the Generalized Polarization of Laurdan Fluorescence. *Biophys J* **1991**,  
684 *60* (1), 179–189.
- 685 (51) Balakrishnan, S.; Mathad, S. S.; Sharma, G.; Raju, S. R.; Reddy, U. B.; Das, S.; Ananthasuresh, G. K.  
686 A Nondimensional Model Reveals Alterations in Nuclear Mechanics upon Hepatitis C Virus  
687 Replication. *Biophysical Journal* **2019**, *116* (7), 1328–1339.  
688 <https://doi.org/10.1016/j.bpj.2019.02.013>.
- 689 (52) de Jong, N. W. M.; van der Horst, T.; van Strijp, J. A. G.; Nijland, R. Fluorescent Reporters for  
690 Markerless Genomic Integration in Staphylococcus Aureus. *Sci Rep* **2017**, *7*, 43889.  
691 <https://doi.org/10.1038/srep43889>.
- 692 (53) Monk, I. R.; Shah, I. M.; Xu, M.; Tan, M.-W.; Foster, T. J. Transforming the Untransformable:  
693 Application of Direct Transformation To Manipulate Genetically Staphylococcus Aureus and  
694 Staphylococcus Epidermidis. *mBio* **3** (2), e00277-11. <https://doi.org/10.1128/mBio.00277-11>.  
695
